# Supplementary material
Source: PubMed Central journal article supplement (PMC8501779)
Supplement: pnas.2104664118.sapp.pdf [file pnas.2104664118.sapp.pdf]

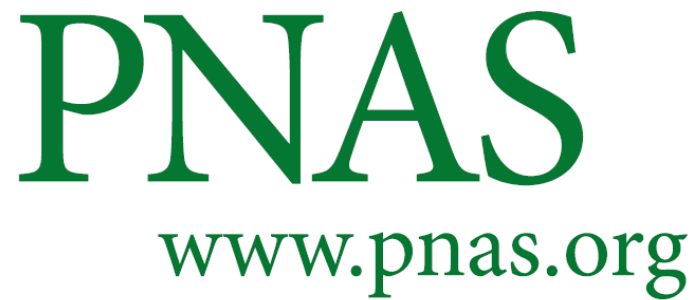

**Supplementary Information for**

**The nuclear ubiquitin ligase adaptor SPOP is a conserved  
regulator of C9orf72 dipeptide toxicity**

Carley Snoznik, Valentina Medvedeva, Jelena Mojsilovic-Petrovic, Paige Rudich,  
James Oosten, Robert G. Kalb, Todd Lamitina

Todd Lamitina, Ph.D.

Email: [stl52@pitt.edu](mailto:stl52@pitt.edu)

Robert Kalb, M.D.

Email: [Robert.kalb1@northwestern.edu](mailto:Robert.kalb1@northwestern.edu)

**This PDF file includes:**

Figures S1 to S10

Tables S1 to S2

Legends for Datasets S1 to S2

**Other supplementary materials for this manuscript include the following:**

Datasets S1 to S2

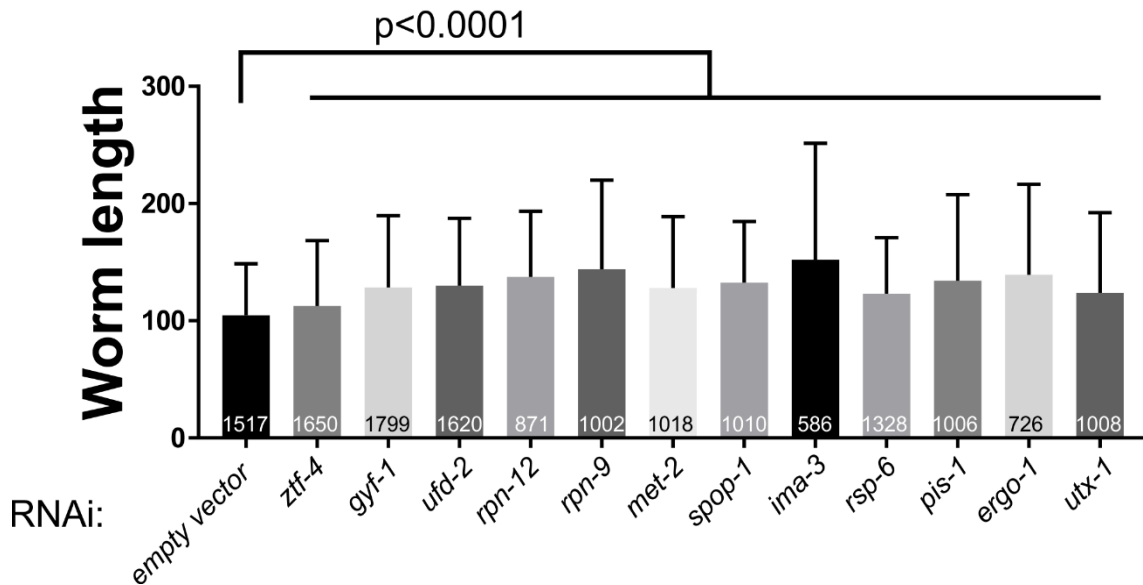

**Fig. S1. Quantification of suppression of (PR)50-induced growth arrest by hits from the genome-wide RNAi screen.** *drls34* eggs were placed on either (empty vector) RNAi or the indicated gene-specific RNAi bacteria. After 7 days at 20° C, animals were washed off the plate and worm length was quantified as the event time-of-flight using a COPAS Biosort. Data shown are mean +/- S.D. The N for each sample is shown on each bar. P-values versus the empty vector control were calculated using a non-parametric one-way ANOVA with Dunn's multiple comparison post-hoc testing.

# (GR)50

*ev(RNAi)*  
*gene(RNAi)*

Trial 1

Trial 2

# of trials with Log-rank  
significant p-value

*ztf-4(RNAi)*

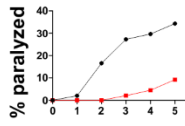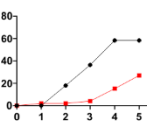

2/2 p<0.05

*gyf-1(RNAi)*

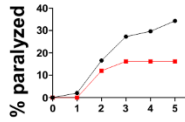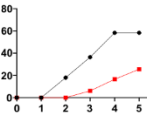

1/2 p<0.05

*ufd-2(RNAi)*

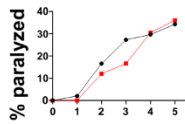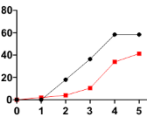

1/2 p<0.05

*rpn-12(RNAi)*

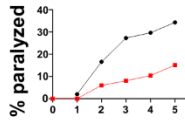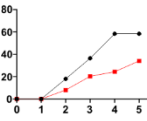

1/2 p<0.05

*rpn-9(RNAi)*

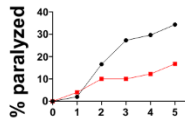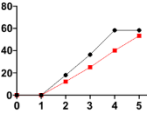

1/2 p<0.05

*met-2(RNAi)*

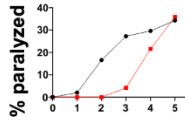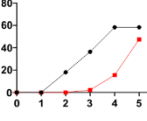

1/2 p<0.05

*spop-1(RNAi)*

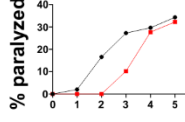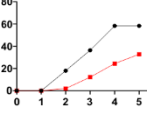

1/2 p<0.05

*ima-3(RNAi)*

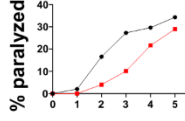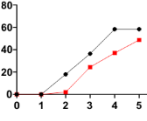

0/2 p<0.05

*rsp-6(RNAi)*

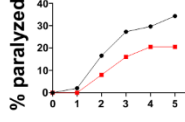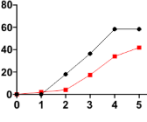

1/2 p<0.05

*pis-1(RNAi)*

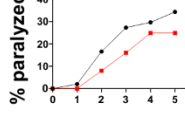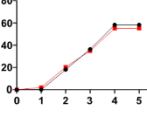

0/2 p<0.05

*ergo-1(RNAi)*

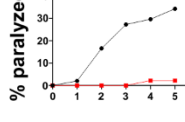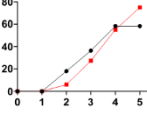

1/2 p<0.05

*utx-1(RNAi)*

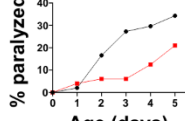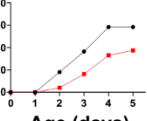

1/2 p<0.05

Age (days)

Age (days)

**Fig. S2. Effect of (PR)50 RNAi screen hits on (GR)50 age-dependent paralysis phenotype.**

Paralysis assays were performed as previously described (63). N=50-80 animals per assay. EV(RNAi) control in black and gene specific RNAi in red. Each candidate gene was scored in two separate assays and the number of times the Log-rank Bonferroni-adjusted p-value was <0.05 is indicated.

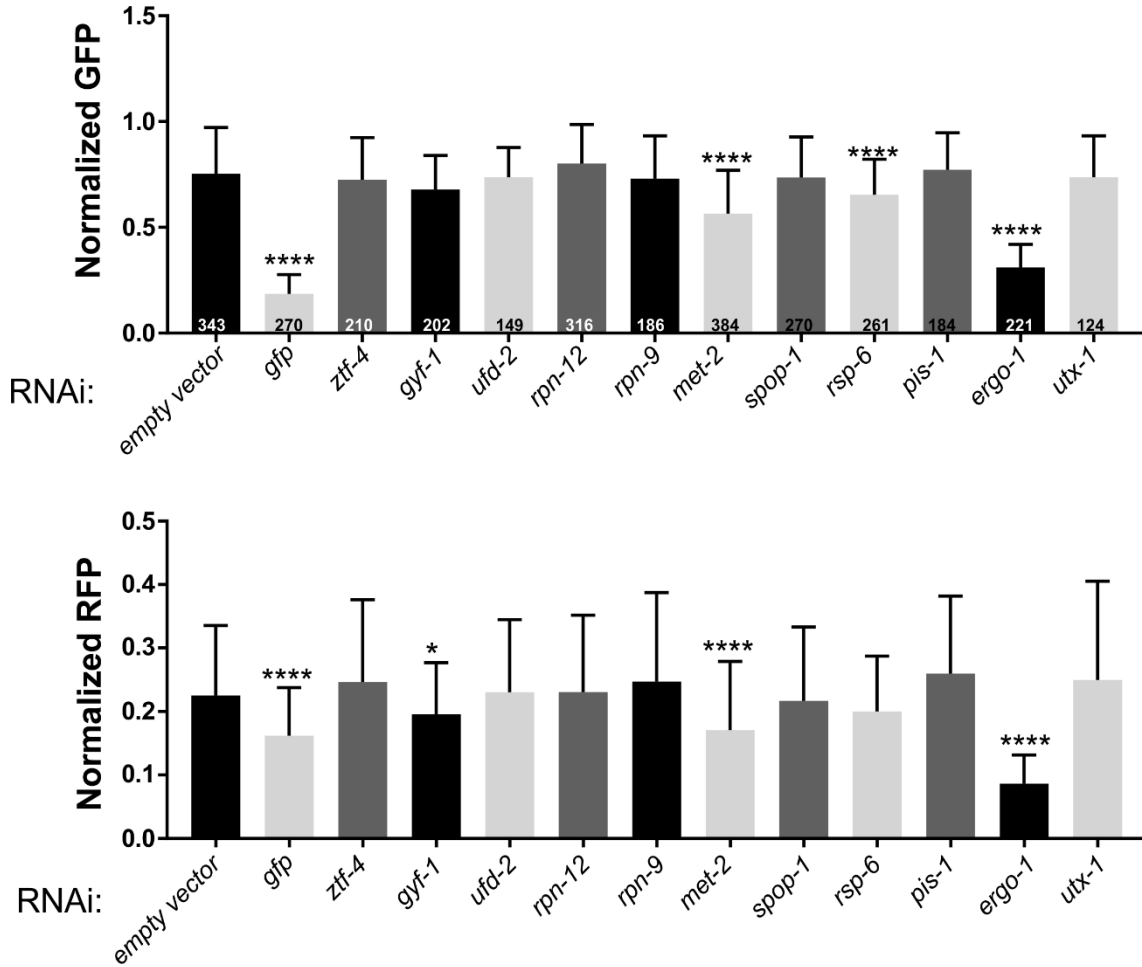

**Fig. S3. Effect of RNAi screen hits on transgene expression.** *drls33* eggs were placed on either *empty vector*(RNAi) or the indicated gene-specific RNAi bacteria. After 7 days at 20°C, animals were washed off the plate and normalized GFP (GFP/TOF; A) and normalized RFP (RFP/TOF; B) from adult animals with TOF>400 were quantified with a COPAS Biosort. Data shown are mean +/- S.D. \* -  $p < 0.05$ , \*\*\*\* -  $p < 0.001$ , non-parametric One-way ANOVA with Dunn's multiple comparisons test. The N for each sample is indicated within each bar.

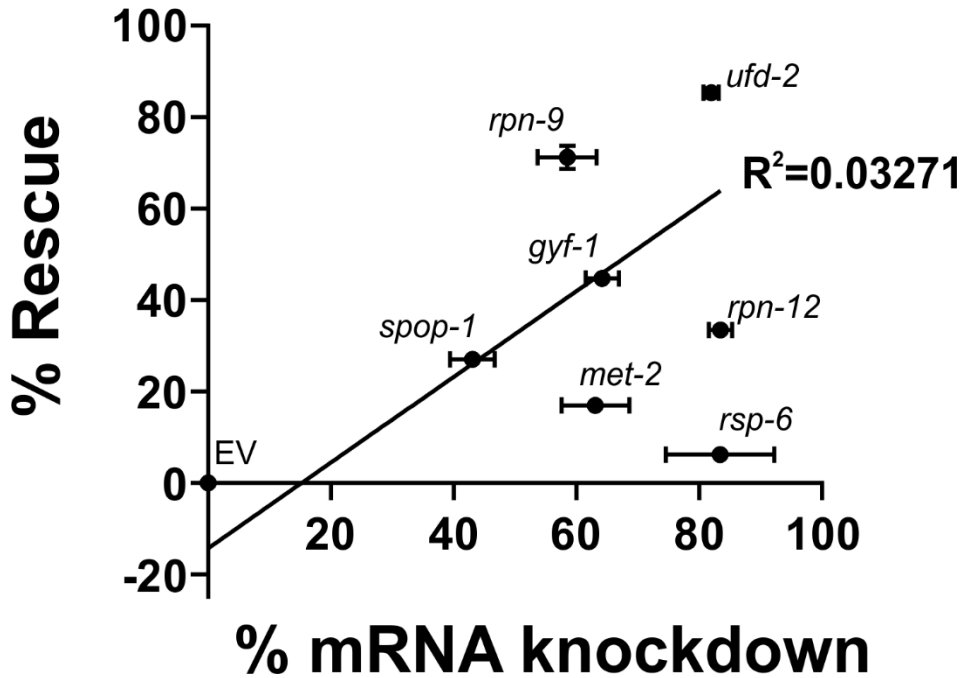

**Fig. S4. Correlation between extent of mRNA knockdown and level of PR50 suppression for RNAi screen hits.** '% Rescue' represents COPAS measured TOF normalized to the mean TOF of the empty vector control. '% mRNA knockdown' represents the level of mRNA reduction following RNAi of the indicated gene. Data shown are mean +/- SEM. For % mRNA knockdown, n=3. For % Rescue, n=2840-54763. R2 was calculated by fitting the data points to a simple linear regression function in GraphPad. Best fit values had a slope of 0.9368, with Y-intercept = -14.32 and X-intercept = 15.29.

## Motor neuron (GR)50 expression

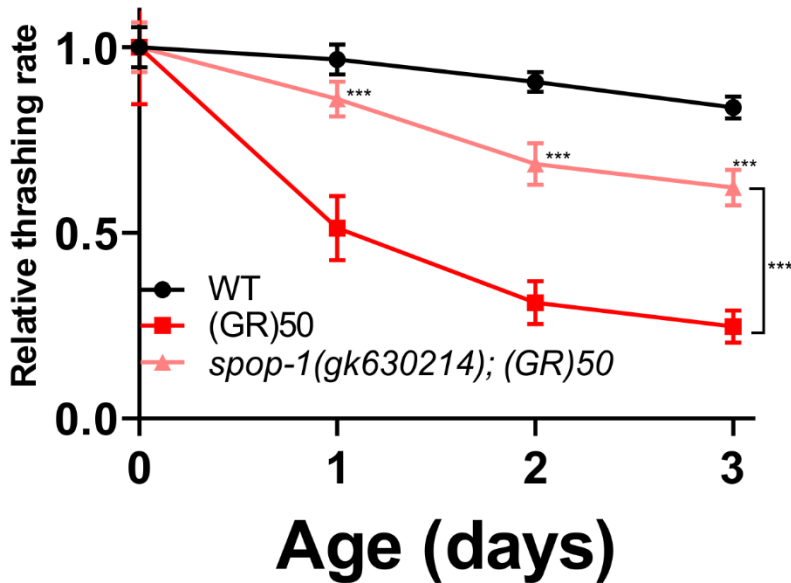

**Fig. S5. *spop-1* functions in motor neurons to protect against motor neuron expressed (GR)50-GFP.** WT or *drls49 (unc-47p::3xFLAG-GR50-GFP)* animals of the indicated genotype were grown at 25°C and L4 stage animals (Day 0) were picked to new plates (4 sets of plates with 10 animals each per genotype). At each time point, the number of thrashes were quantified as previously described (63). The experimenter was blinded to genotype. Data within genotypes were normalized to the thrashing rate at Day 0 and analyzed with a 2-way ANOVA with Tukey's multiple comparisons test to evaluate statistically significant differences among genotypes and specific days. Age variable –  $F_{(3,153)} = 32.04$ ,  $p < 0.0001$ ; Genotype variable –  $F_{(3,153)} = 28.30$ ,  $p < 0.0001$ . Tukey's multiple comparison testing - \*\*\*\* -  $p < 0.0001$ . Data shown are the mean  $\pm$  S.D., N=10.



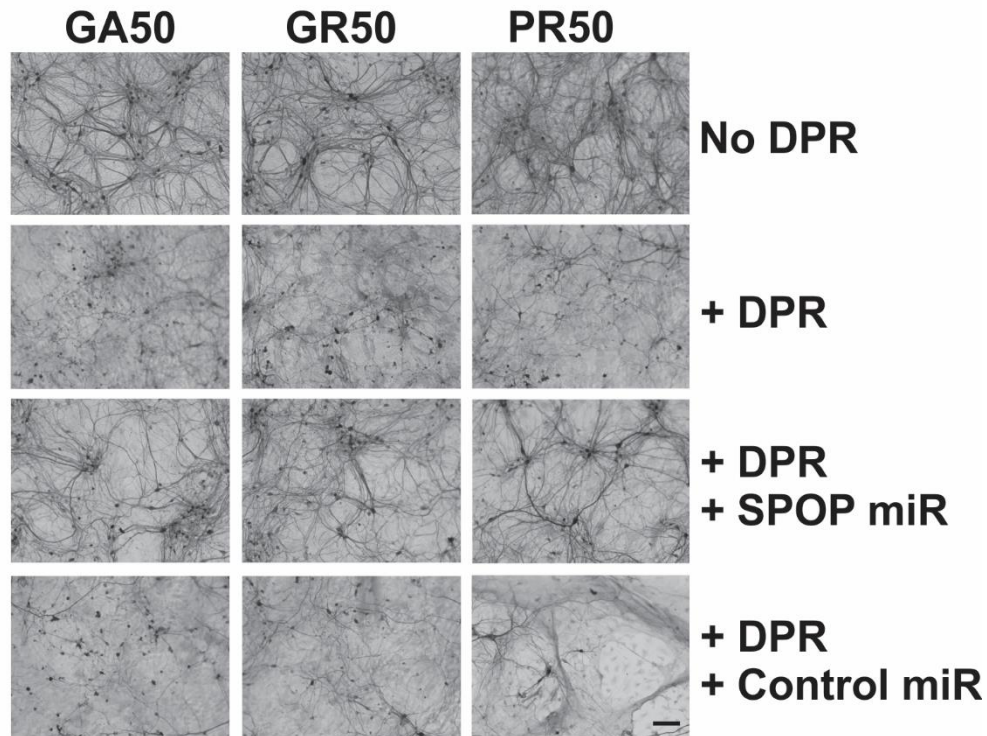

**Fig. S6. SPOP knockdown inhibits DPR-induced toxicity in mammalian neurons.** Representative images of mixed spinal cord cultures immunocytochemically stained with SMI-32 (a monoclonal antibody that recognizes a non-phosphorylated epitope of 168 kD and 200 kD neurofilament), an avidin conjugated secondary antibody, and Vectastain ABC kit (Vector Laboratories). Cells with soma larger than 20 microns reliably identify motor neurons. Images of cultures from four experimental conditions are presented: 1) no DPR, 2) expression of DPRs (e.g., GA50, GR50 or PR50), 3) DPRs plus SPOP miRNA, and 4) DPR plus control miRNA. In comparison with the no DPR condition, expression of individual DPRs leads to a clear reduction of SMI-32 labeled cells. Knockdown of SPOP with the specific miRNA (but not the non-targeting control miRNA), promotes partial rescue from DPR toxicity.

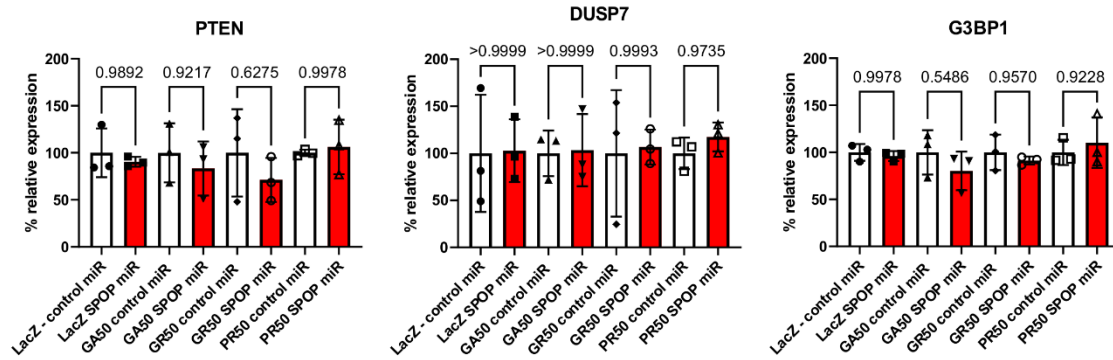

**Fig. S7. Quantification of band intensities from Fig. 4C.** Band intensities were normalized to the mean of the control miR for each DPR. Data shown are mean  $\pm$  S.D.,  $n=3$ . P-values were calculated by a one-way ANOVA with Holm-Šidák multiple comparison test. PTEN –  $F(7,16) = 0.5304$ ,  $p=0.7991$ ; DUSP7 –  $F(7,16) = 0.06932$ ,  $p=0.9992$ ; G3BP1 –  $F(7,16) = 0.7596$ ,  $p=0.6281$ .

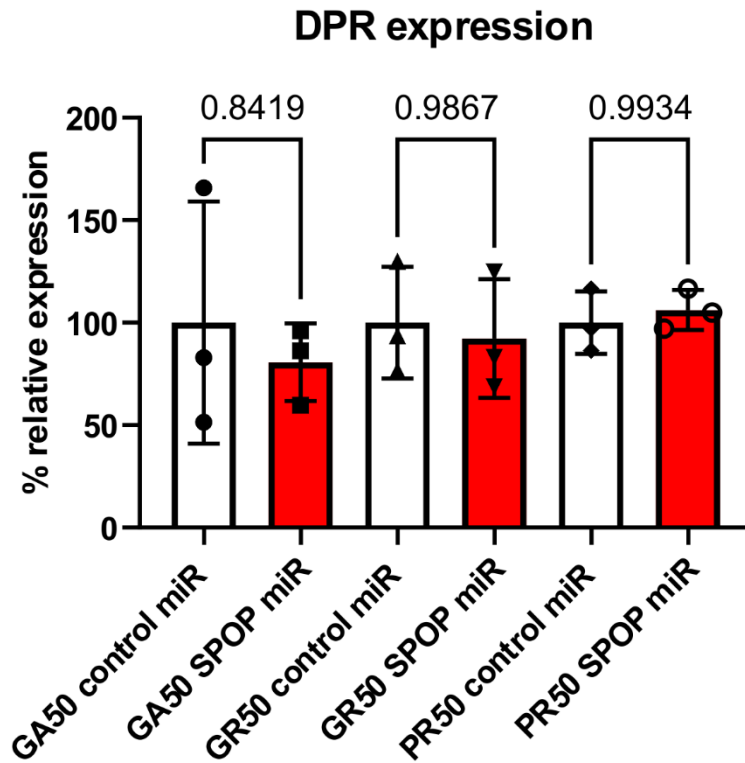

**Fig. S8. Quantification of band intensities from Fig. 4D.** Band intensities were normalized to the mean of the control miR for each DPR. Data shown are mean  $\pm$  S.D.,  $n=3$ . P-values were calculated by a one-way ANOVA with Holm-Šidák multiple comparison test.  $F_{(5,12)} = 0.2496$ ,  $p=0.9320$ .

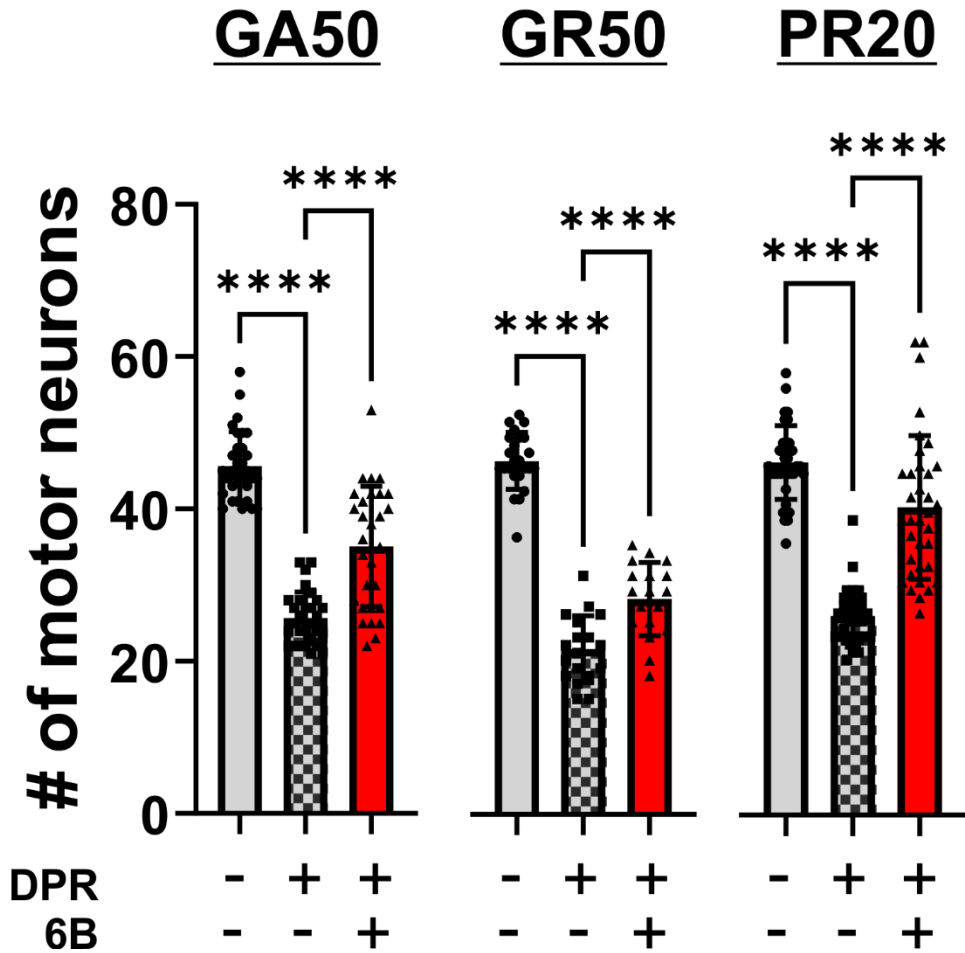

**Fig. S9. The SPOP inhibitor, compound 6B protects against DPR toxicity.**

Days in vitro 14 spinal cord neuron cultures were infected with HSV engineered to express the GA(50), GR(50), LacZ, or exposed to bath applied synthetic PR20 and were treated with either 6B (10  $\mu$ M) or vehicle once. Five days later, cultures were processed for immunocytochemistry and motor neuron counts were obtained. By one-way ANOVA, DPRs lead to a statistically significant reduction in motor neuron number (compared with LacZ expressing cultures) and application of 6B leads to a statistically significant protection against DPR toxicity (e.g., GA(50) group,  $F_{(2,88)} = 97.09$ ,  $p < 0.0001$ ; GR(50) group,  $F_{(2,57)} = 190.2$ ,  $p < 0.0001$ ; PR20 group,  $F_{(2,102)} = 90.49$ ,  $p < 0.0001$ ). Pairwise comparisons were made with Tukey's multiple comparisons test. \*\*\*\* -  $p < 0.0001$ .

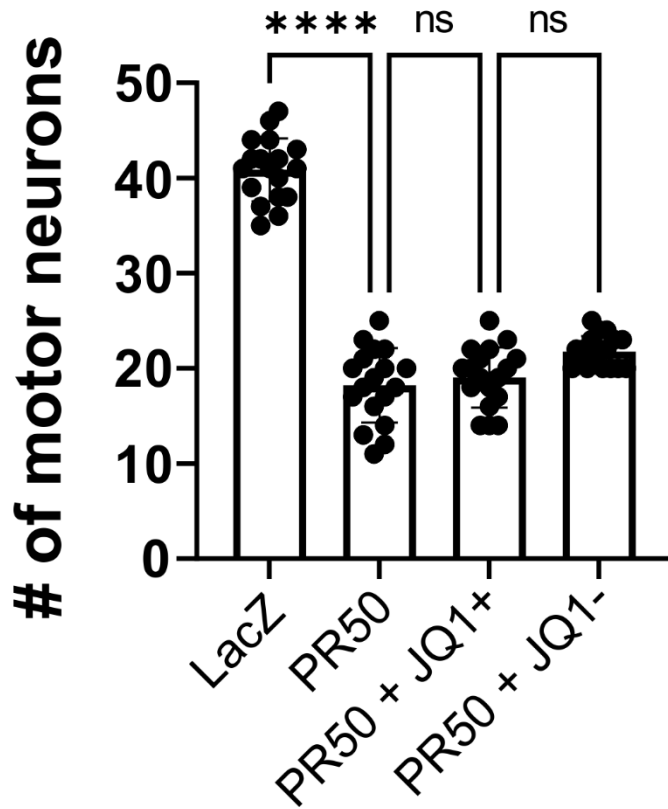

**Figure S10. The BRD domain inhibitor JQ1+ and its inactive isomer JQ1- do not alter PR50 toxicity in mammalian neurons.** Days in vitro 14 spinal cord neuron cultures were infected with HSV engineered to express either PR50 or LacZ and were treated with either JQ1+ or JQ1- (100 nM) once. Five days later, cultures were processed for immunocytochemistry and motor neuron counts were obtained. Neither JQ1+ nor JQ1- significantly altered the toxicity of PR50.  $F_{(3,68)} = 212.4$ ,  $p < 0.0001$ . Tukey's multiple comparison testing - \*\*\*\* -  $p < 0.0001$ , n.s. –  $p = 0.8533$  (PR50 vs PR50 + JQ1+);  $p = 0.0518$  (PR50 JQ1+ vs. PR50 JQ1-).

**Table S1. Strains used in this study**

| <b>Strain name</b> | <b>Genotype</b>                                                         | <b>Reference</b> |
|--------------------|-------------------------------------------------------------------------|------------------|
| <b>OG736</b>       | <i>drls28 [myo-3p::3XFLAG-GR50-gfp; myo-3p:dsRed2]</i>                  | (21)             |
| <b>OG755</b>       | <i>drls34 [myo-3p::3XFLAG-PR50-gfp; myo-3p:dsRed2]</i>                  | (21)             |
| <b>OG919</b>       | <i>met-2(n4256); drls34</i>                                             | This study       |
| <b>OG922</b>       | <i>rsp-6(ok798); drls34</i>                                             | This study       |
| <b>VC40422</b>     | <i>spop-1(gk630214)</i>                                                 | (64)             |
| <b>OG1053</b>      | <i>spop-1(gk630214) drls34</i>                                          | This study       |
| <b>OG1054</b>      | <i>spop-1(gk630214); drls28</i>                                         | This study       |
| <b>OG1055</b>      | <i>spop-1(dr26(CRISPR inserted gfp))</i>                                | This study       |
| <b>OG1057</b>      | <i>spop-1(dr28); drls34</i>                                             | This study       |
| <b>OG1153</b>      | <i>drls49 [unc-47p::3XFLAG-GR50-gfp; unc-47p::gfp; myo-3p::mCherry]</i> | This study       |
| <b>OG1158</b>      | <i>spop-1(dr95(W195G)); drls34</i>                                      | This study       |
| <b>OG1159</b>      | <i>spop-1(dr26 dr96(W195G))</i>                                         | This study       |
| <b>OG1168</b>      | <i>spop-1(dr100(F197V); drls34</i>                                      | This study       |
| <b>OG1169</b>      | <i>spop-1(dr26 dr101(F197V))</i>                                        | This study       |
| <b>OG1171</b>      | <i>spop-1(gk630214); drls49</i>                                         | This study       |

**Table S2. Oligonucleotides used in this study**

| Primer | Sequence                                                                                                                                                     | Description                                                 |
|--------|--------------------------------------------------------------------------------------------------------------------------------------------------------------|-------------------------------------------------------------|
| TL118  | GAGTCAGTGAGCGAGGAAGC                                                                                                                                         | <i>C. elegans</i> feeding RNAi clone sequencing primer      |
| OG1454 | TACCGTACTACACGCATCGCGAGC                                                                                                                                     | <i>rsp-6(ok798)</i> genotyping                              |
| OG1455 | CGAGAGCGGGAGCGACTCTTCGAG                                                                                                                                     | <i>rsp-6(ok798)</i> genotyping                              |
| OG1456 | CGCGTTTATTGAAATCATTTCGCG                                                                                                                                     | <i>rsp-6(ok798)</i> genotyping                              |
| OG1457 | ACGATCACGTTCTTGAGGAGATCG                                                                                                                                     | <i>rsp-6(ok798)</i> genotyping                              |
| OG1458 | GCAGGAAAGATGTATTCGACAAATATGC                                                                                                                                 | <i>rsp-6(ok798)</i> genotyping                              |
| OG1449 | GTGAATCACTTGAGGGACTTTCAC                                                                                                                                     | <i>met-2(n4256)</i> genotyping                              |
| OG1450 | GTCCAACCATAATAGCAATCTGAGC                                                                                                                                    | <i>met-2(n4256)</i> genotyping                              |
| OG1451 | GATGAAGACGTGCTAGTCGCTGC                                                                                                                                      | <i>met-2(n4256)</i> genotyping                              |
| OG1452 | CCTGGTTCACCAGGCATTGTCGGAG                                                                                                                                    | <i>met-2(n4256)</i> genotyping                              |
| OG1453 | CAGGTCTTCGAGTTGCCTGTCCGC                                                                                                                                     | <i>met-2(n4256)</i> genotyping                              |
| OG1534 | AGATCTCCAGTCGCCTTTTC                                                                                                                                         | <i>spop-1(dr28)</i> guide RNA 1                             |
| OG1535 | CGGCATGGGTAACGATGAAG                                                                                                                                         | <i>spop-1(dr28)</i> guide RNA 2                             |
| OG1537 | AATTAACAAATAAATATATTTGAATTTAAGATAAATAAGTGAAAT<br>TTAATTTACAAACTGTAAACGA                                                                                      | <i>spop-1(dr28)</i> repair oligo                            |
| OG1528 | AGCTCGTGGCAAGTGTGCATAC                                                                                                                                       | <i>spop-1(dr28)</i> genotyping                              |
| OG1529 | GTTTCCCGATCCACTCGAGACCTG                                                                                                                                     | <i>spop-1(dr28)</i> genotyping                              |
| OG1459 | GTGCCGAAAACAGTCTGGCAATGG                                                                                                                                     | <i>spop-1(gk630214)</i> genotyping                          |
| OG1460 | GAGATCCACTTCTTCCGGTTGCTG                                                                                                                                     | <i>spop-1(gk630214)</i> genotyping                          |
| OG1461 | CAGTCTGGCAATGGACAAAC                                                                                                                                         | <i>spop-1(gk630214)</i> genotyping                          |
| OG1462 | CCGGTTGCTGAAAATTGGTGTG                                                                                                                                       | <i>spop-1(gk630214)</i> genotyping                          |
| OG1536 | GGCTGTACAAGCACTACGGG                                                                                                                                         | <i>spop-1(dr26)-gfp</i> gRNA                                |
| OG1530 | TTTAGAGCACTAGCAACTCAGCAAACCTCCCGTAATGAGTAA<br>AGGAGAAGAACTTTTC                                                                                               | GFP PCR with <i>spop-1</i> overlaps, CRISPR repair template |
| OG1531 | GTGTTTCGGCCGTTTCTTGGGTGGCTGTACAAGCACTTTGTATA<br>GTTTATCCATGCCATG                                                                                             | GFP PCR with <i>spop-1</i> overlaps, CRISPR repair template |
| OG1532 | GAAGATGGAAGCGTTCAACTAGCA                                                                                                                                     | <i>spop-1::gfp</i> genotyping                               |
| OG1533 | GAGATTCAAGACATTTTCGATGAC                                                                                                                                     | <i>spop-1::gfp</i> genotyping                               |
| OG1819 | GATTTGTACAGGGAAAGGAT                                                                                                                                         | W195G / F197V gRNA                                          |
| OG1820 | CACAGCGGGCTTATCGATTTGTACAGGGAAAGGATGGAGGATT<br>CAAAAAATTCATTTCGACGAGATTTTTTGT                                                                                | W195G repair oligo                                          |
| OG1822 | GCCGCGAAGAAATGGGCGAAG                                                                                                                                        | W195G genotyping                                            |
| OG1823 | CCTGTCACGTTTACTGTTTCGGC                                                                                                                                      | W195G genotyping                                            |
| OG1824 | CTGAAATCTTCCACGTTTTCCGCCG                                                                                                                                    | W195G genotyping                                            |
| OG1825 | CGGCTACCACAGACACTGAAAATTG                                                                                                                                    | W195G genotyping                                            |
| OG1821 | AGGAGACGAAAGCTATGGAATCACAGCGGGCTTATCGCTTTGT<br>CCAAGGTAAGACTGGGGAGTTAAAAATTCATTTCGACGAGATT<br>TTTTGTTGGATGA                                                  | F197V repair oligo                                          |
| OG1826 | ATGCGAAACGAGAGGAGACGAAAGCTATG                                                                                                                                | F197V genotyping                                            |
| OG1827 | AATCTATCTCCAGGAAGAAGCC                                                                                                                                       | F197V genotyping                                            |
| OG1828 | TCACAGCGGGCTTATCGATTTG                                                                                                                                       | F197V genotyping                                            |
| OG1829 | AACAGTCTGGCAATGGACAAAC                                                                                                                                       | F197V genotyping                                            |
| OG1479 | CCTGGAGGCTTGCTGAAGGCTGTATGCTGTATAGCACACAGCTC<br>TCAGCAAGTTTTGGCCACTGACTGACTTGCTGAGCTGGTGCTAT<br>ACAGGACACAAGGCCTGTTACTAGCACTCACATGGAACAAATGG<br>CCT          | SPOP miR 1 sense                                            |
| OG1480 | CCGGAGGCCATTTGTTCCATGTGAGTGCTAGTAACAGGCCTTGT<br>GTCCTGTATAGCACACAGCTCAGCAAGTCAGTCAGTGGCCAAAA<br>CTTGCTGAGAGCTGGTGCTATACAGCATAACAGCCTTCAGCAAGC<br>CTCCAGGCCGG | SPOP miR antisense                                          |
| OG1481 | CCTGGAGGCTTGCTGAAGGCTGTATGCTGAGGAGAACTTCACT<br>ACCTTGAGTTTTGGCCACTGACTGACTCAAGGTAGAAGTTCTCC<br>TCAGGACACAAGGCCTGTTACTAGCACTCACATGGAACAAATGG<br>CCT           | SPOP miR 2 sense                                            |
| OG1482 | CCGGAGGCCATTTGTTCCATGTGAGTGCTAGTAACAGGCCTTGT<br>GTCCTGAGGAGAACTTCTACCTGAGTCAGTCAGTGGCCAAAA<br>TCAAGGTAGTGAAGTTCTCCTCAGCATACAGCCTTCAGCAAGCC<br>TCCAGGCCGG     | SPOP miR 2 antisense                                        |
| OG1485 | GCTCTTAAGGCTAGAGTACTT                                                                                                                                        | p1006 miR vector sequencing                                 |
| OG1486 | GGAATTGATCCTTATCGATT                                                                                                                                         | p1006 miR vector sequencing                                 |

**Dataset S1 (separate file). Summary statistics for all featured and replicate paralysis assays.**

**Dataset S2 (separate file). Raw data files for Fig. 1-5 and Fig. S1-S10**
